# Supplementary material
Source: publisher site journal article supplement (https://www.dovepress.com/article/340147)
Supplement: Supplementary file 1 [file get_supplementary_file.php]

**Appendix 1:**

**Questionnaire**

1. **What is your gender?**
2. Male
3. Female
4. **What is your Age?**

Answer: …………….

1. **Which Medical college did graduated from?**
2. King Saud University
3. King Abdulaziz University
4. King Faisal University
5. Imam Muhammad bin Saud Islamic University
6. Imman Abdulrahman bin Faisal University
7. King Khalid University
8. Albaha University
9. Najran University
10. Umm Alqura University
11. Northen Border University
12. Almajmaa University
13. Shaqra University
14. Princess Nourah bint Abdulrahman University
15. University of Tabuk
16. Aljouf University
17. University of Bisha
18. Jazan University
19. Alfaisal University
20. King Saud bin Abdulaziz University for Health Sciences, Riyadh
21. King Saud bin Abdulaziz University for Health Sciences, Jeddah
22. Almaarefah University
23. Qassim University
24. Prince Sattam bin Abdulaziz University
25. Tiabah University
26. Jeddah University
27. Taif University
28. Dar Aluloom University
29. Alfarabi Colleges
30. University of Hail
31. Other ………………………………………………………………
32. **Did your medical school curriculum includes mandatory teaching or experiences in ophthalmology?**
33. Yes
34. No
35. Unsure
36. **How much exposure to ophthalmology did you receive in medical school?**
37. No Exposure
38. Too little exposure
39. Just the right amount
40. Too much exposure
41. Unsure
42. **When was your ophthalmology rotation during medical college (Excluding the fundamental year):**
43. 3rd Year
44. 4th Year
45. 5th Year (Final year)
46. No ophthalmology rotation in my university/college
47. **Duration spent on learning ophthalmology in your medical school**
48. 5 days or less
49. 1 week
50. 2 weeks
51. 3 weeks or more
52. I did not receive any ophthalmology training
53. **How would you rate the quality of ophthalmology education in your medical school?**
54. Excellent
55. Very good
56. Average
57. Poor
58. Very poor
59. I did not receive any ophthalmology training
60. **The most common method/s used for teaching (you can choose more than one):**
61. Theoretical lectures
62. Small-group discussions
63. Clinical (ER,OR, clinics)
64. Self-directed learning
65. **Have you been exposed, took ophthalmic history or ophthalmic examination of patients during ophthalmology training?**
66. Yes
67. No
68. **In your medical college, which of the following locations you have most encountered ophthalmic patients?**
69. Ophthalmology clinic
70. Emergency department
71. Operating room
72. Family medicine practice
73. No contact with ophthalmic patients
74. Other ………………………………………………………………
75. **Which areas in ophthalmology were you exposed to during medical school (you can chose more than one)?**
76. Cornea and external diseases
77. Lens and cataract
78. Neuro-ophthalmology
79. Vitreoretinal disease
80. Glaucoma
81. Pediatric ophthalmology and strabismus
82. Diseases of the eyelid, lacrimal system, and orbit
83. Ocular manifestations of systemic diseases
84. Intraocular tumors
85. Refraction and contact lens
86. Refractive surgery
87. Unsure
88. **Do you believe that, learning about ophthalmology was important for your particular residency program?**
89. Yes
90. No
91. Neutral
92. **Do you believe that, learning how to conduct a complete ocular history is important?**
93. Yes
94. No
95. Neutral
96. **How competent do you feel obtaining ocular history?**
97. Competent
98. Incompetent
99. **Do you believe that, learning about Visual acuity testing is important?**
100. Yes
101. No
102. Neutral
103. **How competent do you feel testing the visual acuity?**
104. Competent
105. Incompetent
106. **Do you believe that, learning about Visual field examination is important?**
107. Yes
108. No
109. Neutral
110. **How competent do you feel doing visual field examination?**
111. Competent
112. Incompetent
113. **Do you believe that, learning about extra ocular motility examination is important?**
114. Yes
115. No
116. Neutral
117. **How competent do you feel in examining Extra ocular motility?**
118. Competent
119. Incompetent
120. **Do you believe that, learning about pupillary light reflex assessment is important?**
121. Yes
122. No
123. Neutral
124. **How competent do you feel in doing Pupillary light reflex assessment?**
125. Competent
126. Incompetent
127. **Do you believe that, learning about pupillary dilation, and Fundoscopy with direct ophthalmoscope are important?**
128. Yes
129. No
130. Neutral
131. **How competent do you feel in doing pupillary dilation, and Fundoscopy with direct ophthalmoscope?**
132. Competent
133. Incompetent
134. **Do you believe that, learning about Slit-lamp examination is important?**
135. Yes
136. No
137. Neutral
138. **How competent do you feel in doing Slit-lamp examination?**
139. Competent
140. Incompetent
141. **Do you believe that, learning about corneal examination with fluorescein dye is important?**
142. Yes
143. No
144. Neutral
145. **How competent do you feel in doing corneal examination with fluorescein dye?**
146. Competent
147. Incompetent
148. **Do you believe that, learning about intraocular pressure is important?**
149. Yes
150. No
151. Neutral
152. **How competent do you feel in the assessment of intraocular pressure?**
153. Competent
154. Incompetent
155. **Do you believe that, learning about anterior chamber depth is important?**
156. Yes
157. No
158. Neutral
159. **How competent do you feel in the assessment of anterior chamber depth?**
160. Competent
161. Incompetent
162. **Do you believe that, knowing the indication for referral to ophthalmology services is important?**
163. Yes
164. No
165. Neutral
166. **How competent do you feel in knowing and understanding the Indications for referral to ophthalmology services?**
167. Competent
168. Incompetent
